# Supplementary figures and images for: Knowledge, Attitude and Practice of Surgical Nurses on Enhanced Recovery after Surgery (ERAS) protocols: Multicentre Cross-sectional study
Source: Research Square preprint supplement (doi:10.21203/rs.3.rs-5191118/v1), 2024-10-23

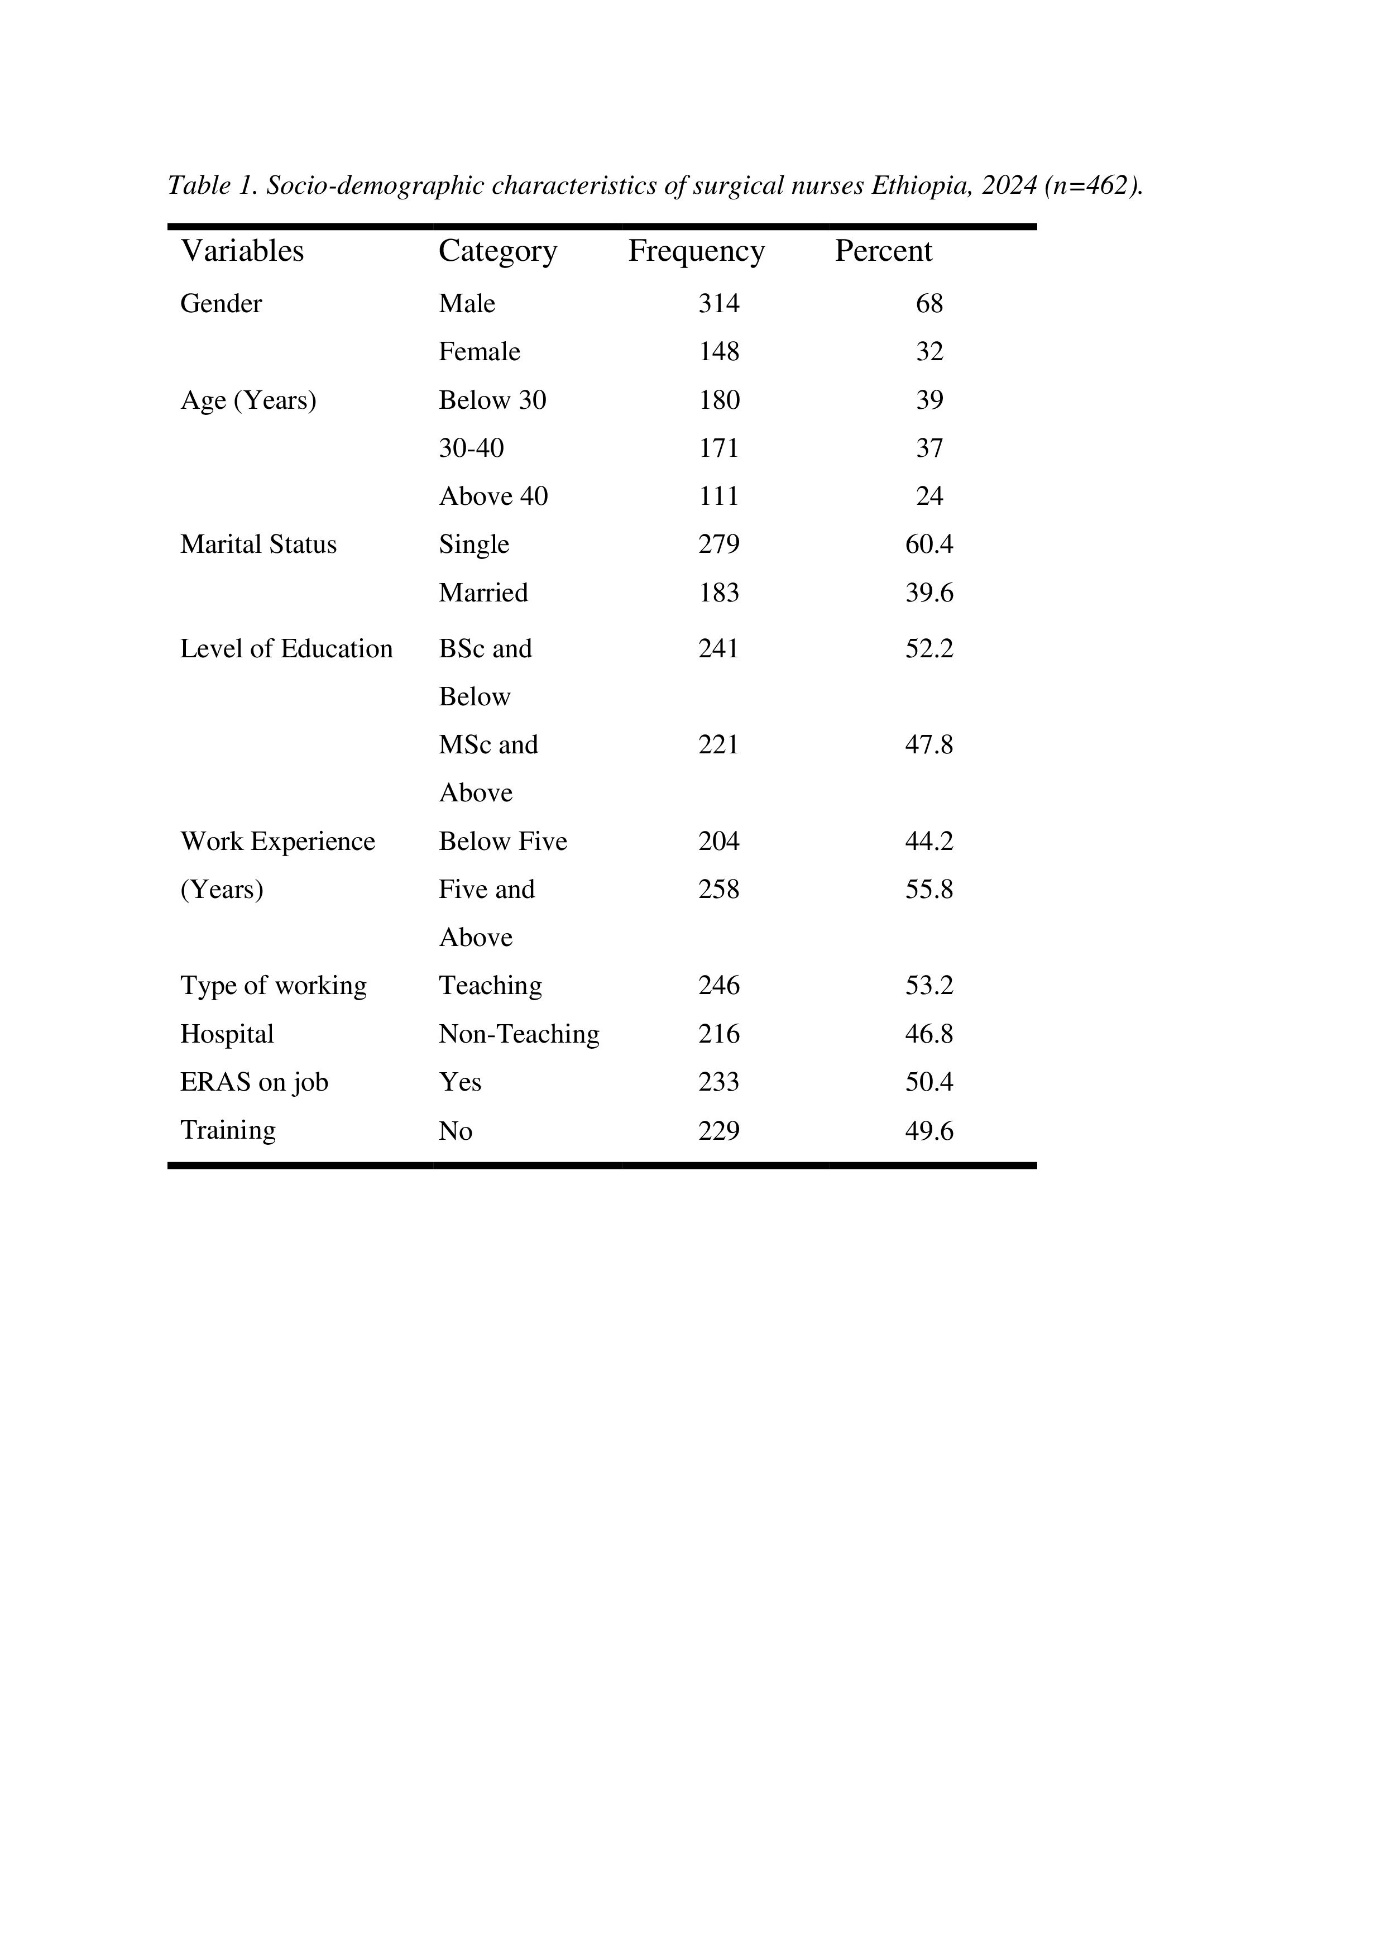


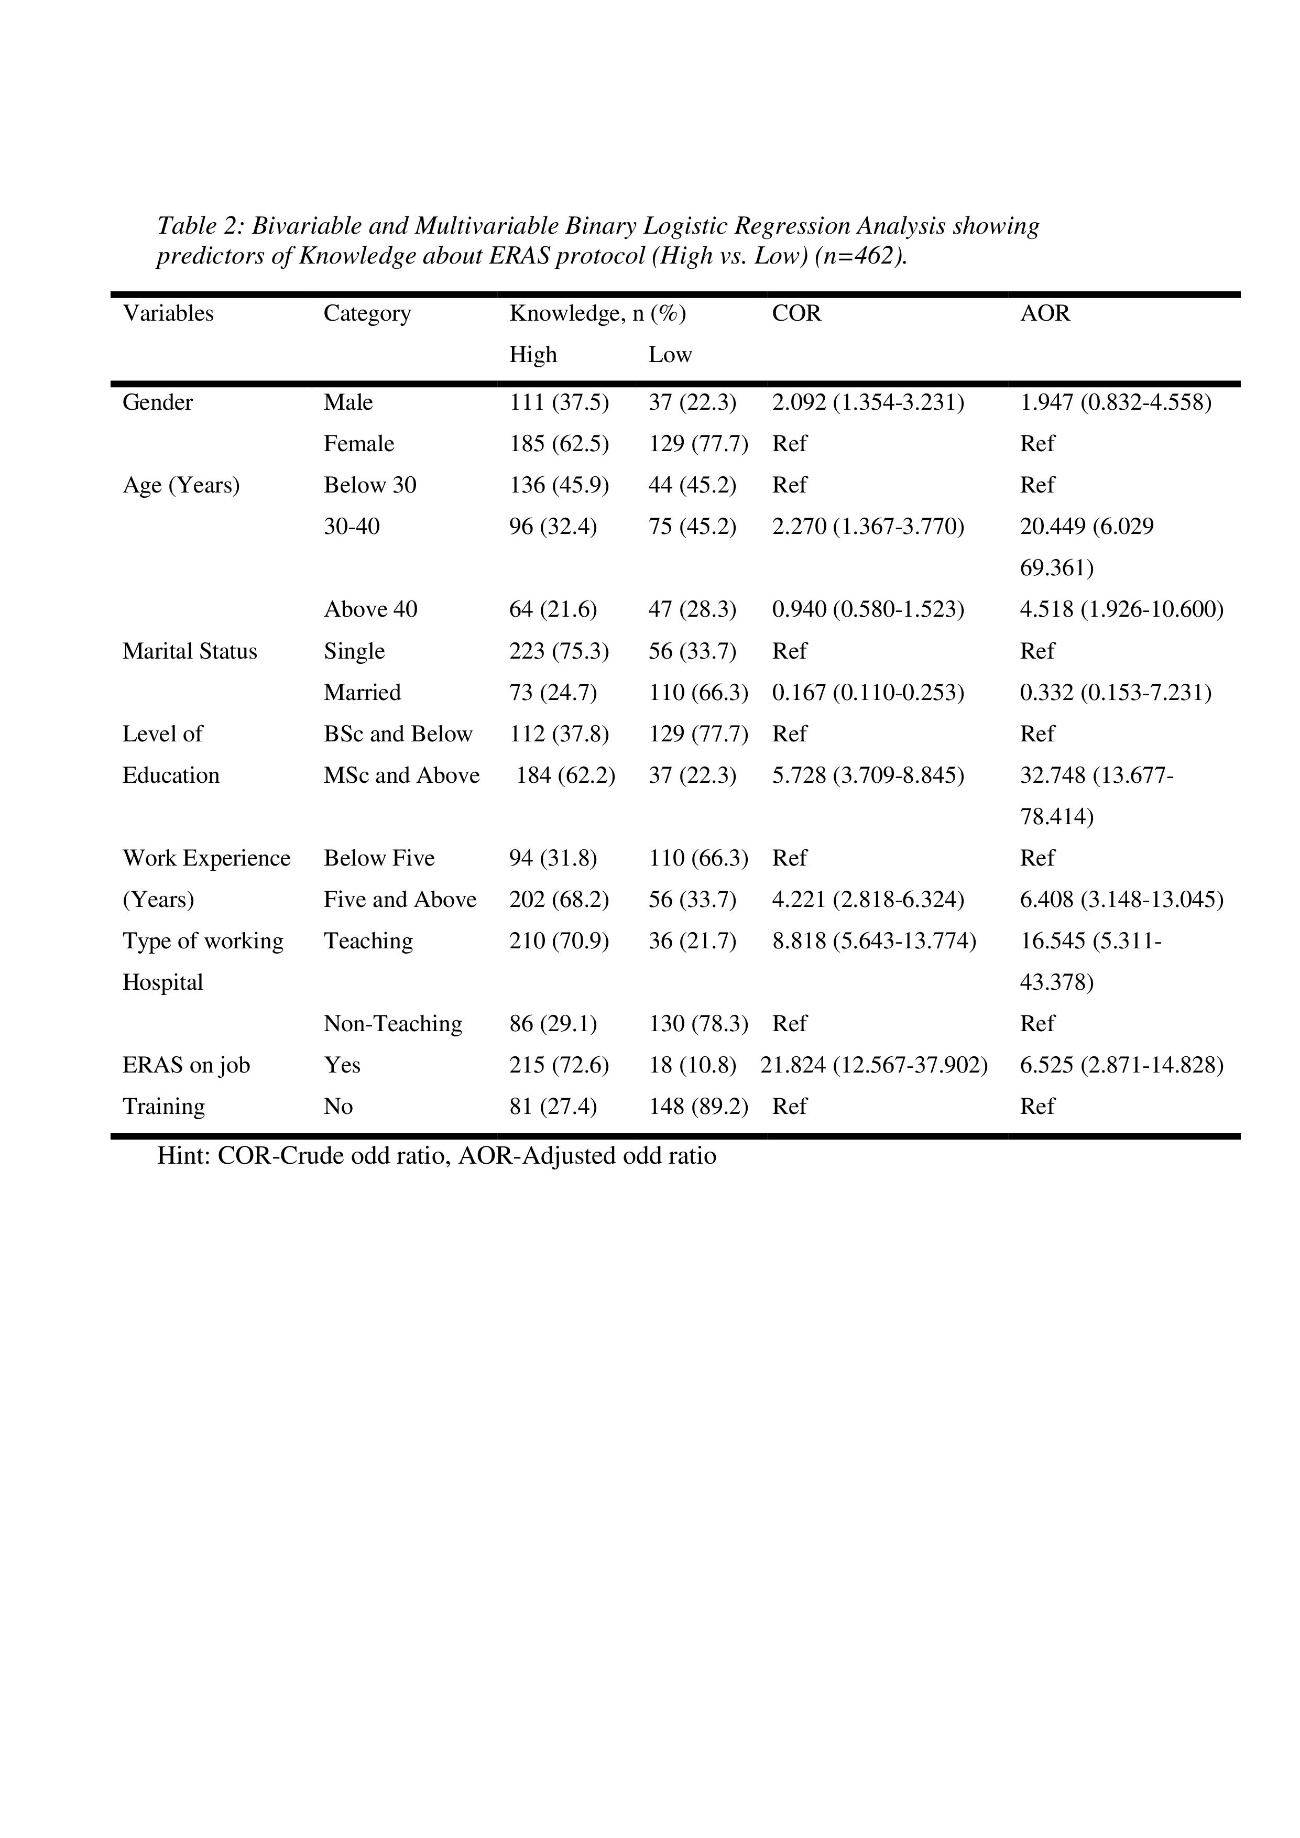


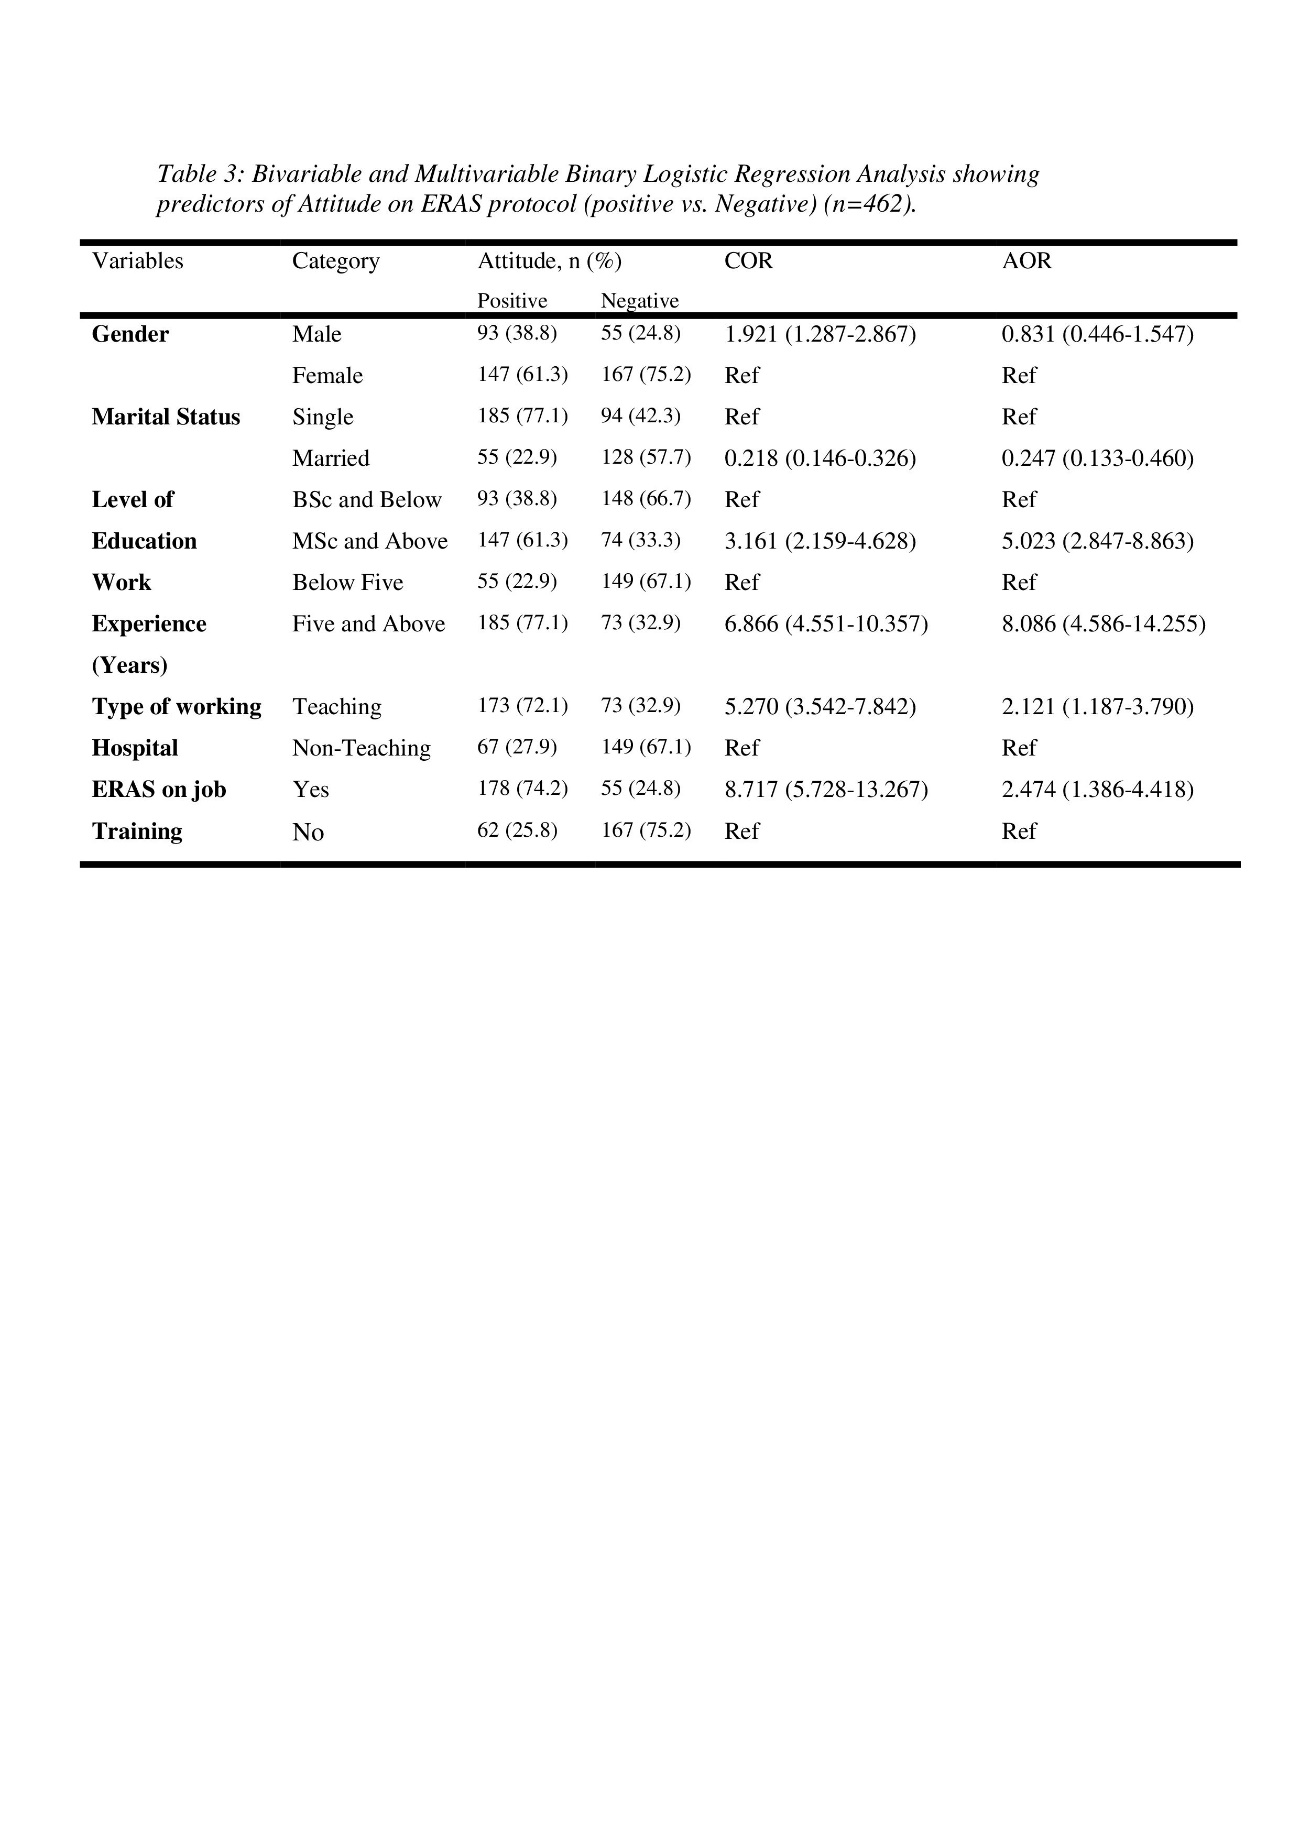


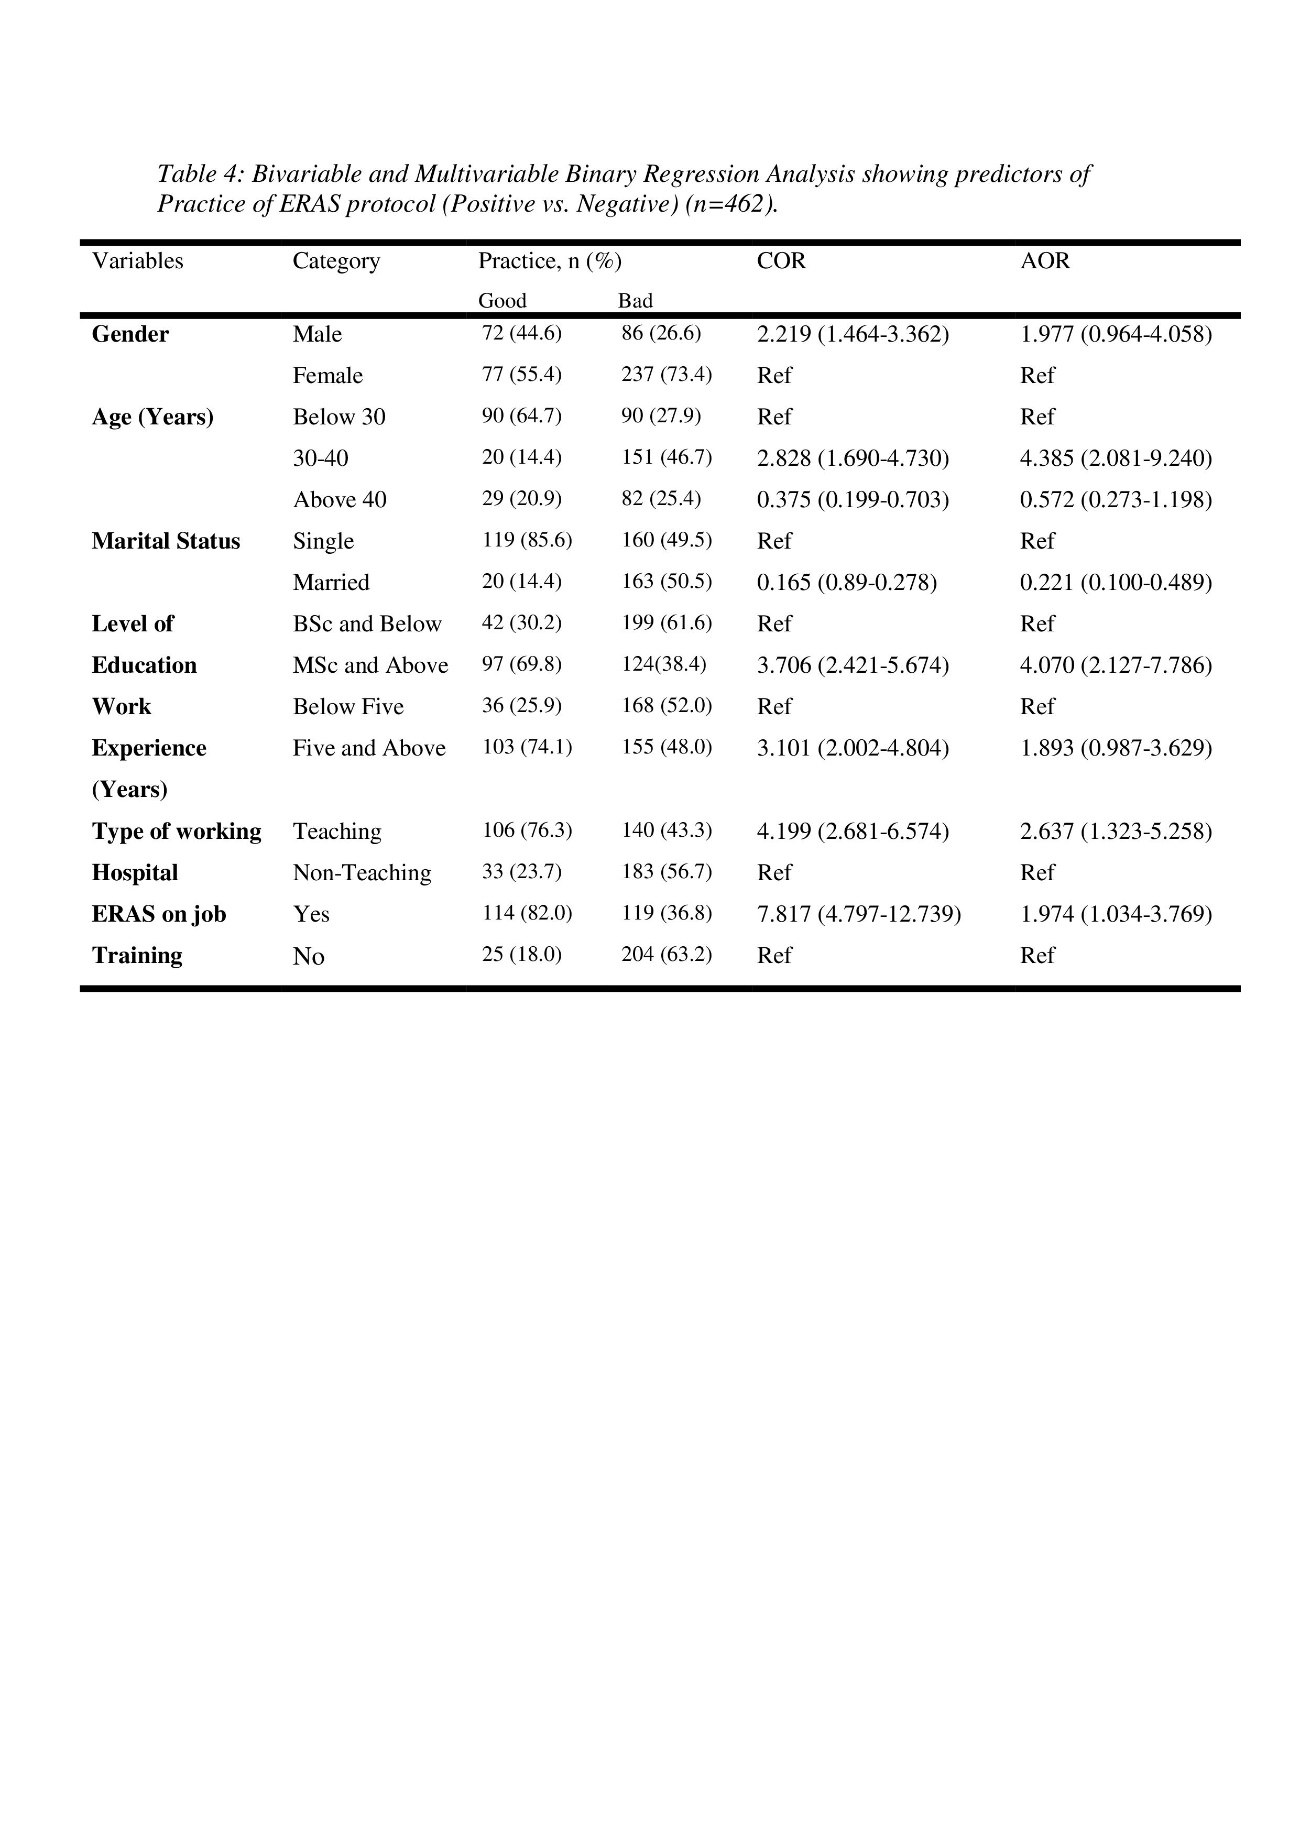

Supplement: Supplementary file 1 [file 23649a1c6eda386853969fbd.docx]
